# Supplementary material for: FasTag: automatic text classification of unstructured medical narratives
Source: bioRxiv or medRxiv preprint supplement (doi:10.1101/429720), 2019-04-13
Supplement: Supplementary file [file 429720-1.pdf]

## Deep learning facilitates rapid cohort identification using human and veterinary clinical narratives

STROBE Statement—Checklist of items that should be included in reports of *cohort studies*

|                          | Item No | Recommendation                                                                                                                                                                       | Author's assessment                                                                        |
|--------------------------|---------|--------------------------------------------------------------------------------------------------------------------------------------------------------------------------------------|--------------------------------------------------------------------------------------------|
| Title and abstract       | 1       | (a) Indicate the study's design with a commonly used term in the title or the abstract                                                                                               | See Methods in the Abstract.                                                               |
|                          |         | (b) Provide in the abstract an informative and balanced summary of what was done and what was found                                                                                  | See Methods and Findings in the Abstract.                                                  |
| <b>Introduction</b>      |         |                                                                                                                                                                                      |                                                                                            |
| Background/rationale     | 2       | Explain the scientific background and rationale for the investigation being reported                                                                                                 | See Introduction, paragraph 1                                                              |
| Objectives               | 3       | State specific objectives, including any prespecified hypotheses                                                                                                                     | See "Learning on human and veterinary medical records" in the Introduction section         |
| <b>Methods</b>           |         |                                                                                                                                                                                      |                                                                                            |
| Study design             | 4       | Present key elements of study design early in the paper                                                                                                                              | See Study Design in the Methods section.                                                   |
| Setting                  | 5       | Describe the setting, locations, and relevant dates, including periods of recruitment, exposure, follow-up, and data collection                                                      | See Clinical Setting in the Methods section                                                |
| Participants             | 6       | (a) Give the eligibility criteria, and the sources and methods of selection of participants. Describe methods of follow-up                                                           | See Patients in the Methods section paragraph 1.                                           |
|                          |         | (b) For matched studies, give matching criteria and number of exposed and unexposed                                                                                                  | Not applicable.                                                                            |
| Variables                | 7       | Clearly define all outcomes, exposures, predictors, potential confounders, and effect modifiers. Give diagnostic criteria, if applicable                                             | See categories in Table 2 of the Methods Section; and Table 1 of Supplementary Material 2. |
| Data sources/measurement | 8*      | For each variable of interest, give sources of data and details of methods of assessment (measurement). Describe comparability of assessment methods if there is more than one group | See Clinical Setting and Patients in the Methods section.                                  |
| Bias                     | 9       | Describe any efforts to address potential sources of bias                                                                                                                            | See Figure 1 in Study Design in the Methods section.                                       |
| Study size               | 10      | Explain how the study size was arrived at                                                                                                                                            | See Patients in the Methods section.                                                       |
| Quantitative variables   | 11      | Explain how quantitative variables were handled in the analyses. If                                                                                                                  | See Deep learning models and Natural Language Processing in the Methods section.           |

|                     |     |                                                                                                                                                                                                              |                                                                                                                                         |
|---------------------|-----|--------------------------------------------------------------------------------------------------------------------------------------------------------------------------------------------------------------|-----------------------------------------------------------------------------------------------------------------------------------------|
|                     |     | applicable, describe which groupings were chosen and why                                                                                                                                                     |                                                                                                                                         |
| Statistical methods | 12  | (a) Describe all statistical methods, including those used to control for confounding                                                                                                                        | See Study Design and Statistical analysis in the Methods section.                                                                       |
|                     |     | (b) Describe any methods used to examine subgroups and interactions                                                                                                                                          | Not applicable.                                                                                                                         |
|                     |     | (c) Explain how missing data were addressed                                                                                                                                                                  | See Patients in the Methods section.                                                                                                    |
|                     |     | (d) If applicable, explain how loss to follow-up was addressed                                                                                                                                               | Not applicable since it is a retrospective study.                                                                                       |
|                     |     | (e) Describe any sensitivity analyses                                                                                                                                                                        | Not applicable                                                                                                                          |
| <b>Results</b>      |     |                                                                                                                                                                                                              |                                                                                                                                         |
| Participants        | 13* | (a) Report numbers of individuals at each stage of study—e.g. numbers potentially eligible, examined for eligibility, confirmed eligible, included in the study, completing follow-up, and analysed          | See Table 2 in the Methods section.                                                                                                     |
|                     |     | (b) Give reasons for non-participation at each stage                                                                                                                                                         | Not applicable since this is a chart review retrospective study, from de-identified data previously collected as part of care delivery. |
|                     |     | (c) Consider use of a flow diagram                                                                                                                                                                           | Table 2 shows sufficient information.                                                                                                   |
| Descriptive data    | 14* | (a) Give characteristics of study participants (e.g. demographic, clinical, social) and information on exposures and potential confounders                                                                   | See Table 2.                                                                                                                            |
|                     |     | (b) Indicate number of participants with missing data for each variable of interest                                                                                                                          | Not applicable.                                                                                                                         |
|                     |     | (c) Summarise follow-up time (eg, average and total amount)                                                                                                                                                  | Not applicable.                                                                                                                         |
| Outcome data        | 15* | Report numbers of outcome events or summary measures over time                                                                                                                                               | Not applicable.                                                                                                                         |
| Main results        | 16  | (a) Give unadjusted estimates and, if applicable, confounder-adjusted estimates and their precision (eg, 95% confidence interval). Make clear which confounders were adjusted for and why they were included | See Table 3 in the Results section.                                                                                                     |
|                     |     | (b) Report category boundaries when continuous variables were categorized                                                                                                                                    | Not applicable.                                                                                                                         |
|                     |     | (c) If relevant, consider translating estimates of relative risk into absolute risk for a meaningful time period                                                                                             | Not applicable.                                                                                                                         |
| Other analyses      | 17  | Report other analyses done—e.g. analyses of subgroups and interactions, and sensitivity analyses                                                                                                             | Not applicable.                                                                                                                         |

| <b>Discussion</b>        |    |                                                                                                                                                                            |                                                          |
|--------------------------|----|----------------------------------------------------------------------------------------------------------------------------------------------------------------------------|----------------------------------------------------------|
| Key results              | 18 | Summarise key results with reference to study objectives                                                                                                                   | See Paragraph 1 in the Discussion section.               |
| Limitations              | 19 | Discuss limitations of the study, taking into account sources of potential bias or imprecision. Discuss both direction and magnitude of any potential bias                 | See Paragraph 4 in the Discussion section.               |
| Interpretation           | 20 | Give a cautious overall interpretation of results considering objectives, limitations, multiplicity of analyses, results from similar studies, and other relevant evidence | See Paragraphs 2-3 in the Discussion section.            |
| Generalisability         | 21 | Discuss the generalisability (external validity) of the study results                                                                                                      | See Public Health Implications in the Discussion section |
| <b>Other information</b> |    |                                                                                                                                                                            |                                                          |
| Funding                  | 22 | Give the source of funding and the role of the funders for the present study and, if applicable, for the original study on which the present article is based              | See Funding in the Declarations section                  |

\*Give information separately for exposed and unexposed groups.

**Note:** An Explanation and Elaboration article discusses each checklist item and gives methodological background and published examples of transparent reporting. The STROBE checklist is best used in conjunction with this article (freely available on the Web sites of PLoS Medicine at <http://www.plosmedicine.org/>, Annals of Internal Medicine at <http://www.annals.org/>, and Epidemiology at <http://www.epidem.com/>). Information on the STROBE Initiative is available at <http://www.strobe-statement.org>.
